# Supplementary material
Source: publisher site journal article supplement (https://www.dovepress.com/article/352599)
Supplement: Supplementary file 1 [file get_supplementary_file.php]

## Supplementary materials

### **Appendix 1 Questionnaire/ Survey form (course evaluations)**

#### **Quantitative questions on the Likert scale of one to five.**

1. The Instructor stimulated student's interest in the subject
2. The instructor managed classroom time and pace well
3. The instructor was organized and prepared for every class
4. The instructor encouraged discussions and responded to questions
5. The instructor demonstrated in-depth knowledge of the subject
6. The instructor appeared enthusiastic and interested
7. The instructor used a variety of instructional methods to reach the course objectives (e.g., group discussions, audiovisual aids, & Standardized Patient program, etc.)-
8. Information about the assessment was communicated clearly.
9. Feedback was provided within the stated time frame. (Providing the rationale).
10. Feedback showed how to improve my work
11. The course objectives were clear
12. The course procedures and assignments support course objectives
13. The instructor gave guidance on where to find resources.
14. Overall, how student's experience in this course
15. Student contributed constructively to in-class activities.
16. Student's perception of achieving course learning objectives

## **Appendix 2- Interview Schedule Questions**

- 1) What is your opinion on online teaching in general even before the Covid-19 pandemic?
- 2) What are the stimulators to online teaching?
- 3) What are the obstacles to online teaching?
- 4) What are the best things that you like about online teaching?
- 5) What are the things that you like the least about online teaching?

## Coding tree

| Codes                                                                           | Categories/subthemes                                | Themes                                               |
|---------------------------------------------------------------------------------|-----------------------------------------------------|------------------------------------------------------|
| did not have any previous experiences with online teaching                      |                                                     |                                                      |
| Few students did some online courses                                            |                                                     | Earlier experience with online teaching and learning |
| had never thought of online teaching in medical school                          |                                                     |                                                      |
| current circumstances and the ongoing pandemic                                  |                                                     |                                                      |
| Online instruction for basic science courses is the only option                 | Current circumstances and ongoing Pandemic          |                                                      |
| have all kinds of resources and technologies                                    |                                                     |                                                      |
| think it's time                                                                 | Saving Time                                         | Stimulators for emergency remote teaching            |
| helpful for students with financial issues and physical disabilities.           |                                                     |                                                      |
| technological difficulties, power issues, and network problems, sometimes       |                                                     |                                                      |
| might not understand or acknowledge the technical challenges                    | Technological difficulties and technical challenges |                                                      |
| time differences (different time zones).                                        |                                                     | Obstacles for emergency remote teaching              |
| faculty members get fatigued                                                    | Online Fatigue and lack of personal interactions    |                                                      |
| Faculty were not ready                                                          |                                                     |                                                      |
| class could be very monotonous in remote education when no personal interaction |                                                     |                                                      |
| availability of many resources and technologies                                 |                                                     |                                                      |
| convenient and flexible                                                         | Convenience and flexibility                         |                                                      |
| teaching can have sessions recorded, and recorded videos can be played again    |                                                     |                                                      |
| saving time with remote teaching,                                               | Saving time and other benefits                      | Advantages of emergency remote teaching              |

|                                                                                                |                                                       |                                            |
|------------------------------------------------------------------------------------------------|-------------------------------------------------------|--------------------------------------------|
| introverts and shy students became very communicative and interact well during online classes. |                                                       |                                            |
| lack of hands-on experiences and personal interaction                                          | Limited hands-on experience and personal interactions |                                            |
| lacks classroom experience                                                                     |                                                       | Disadvantages of emergency remote teaching |
| lack of motivation for students.                                                               | Lack of motivation                                    |                                            |
| Procrastination                                                                                |                                                       |                                            |
